# Supplementary material for: OsCIPK9 Interacts with OsSOS3 and Affects Salt-Related Transport to Improve Salt Tolerance
Source: MDPI journal article supplement (doi:10.3390/plants12213723), 2023-10-30
Supplement: s1 [file s1]

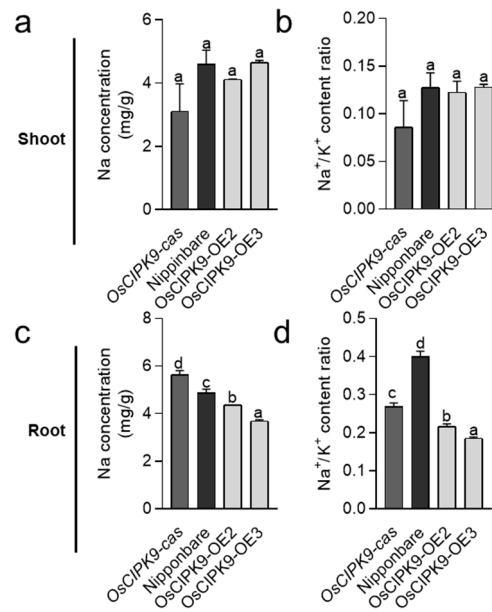

Figure S1. Comparison of Nipponbare (Nip), knock-out line (*OsCIPK9-cas*) and overexpression lines (*OsCIPK9-OE2*, *OsCIPK9-OE3*) Na concentrations per plant and Na<sup>+</sup>/K<sup>+</sup> content ratios in shoot and root under 0mM NaCl conditions. a-b: The comparison in shoot. c-d: The comparison in root. n = 3. Data are presented as means ± SD. Statistical significance (versus the Nip) were calculated with Student's *t*-test. Different letters indicate significant difference, *P* < 0.05.

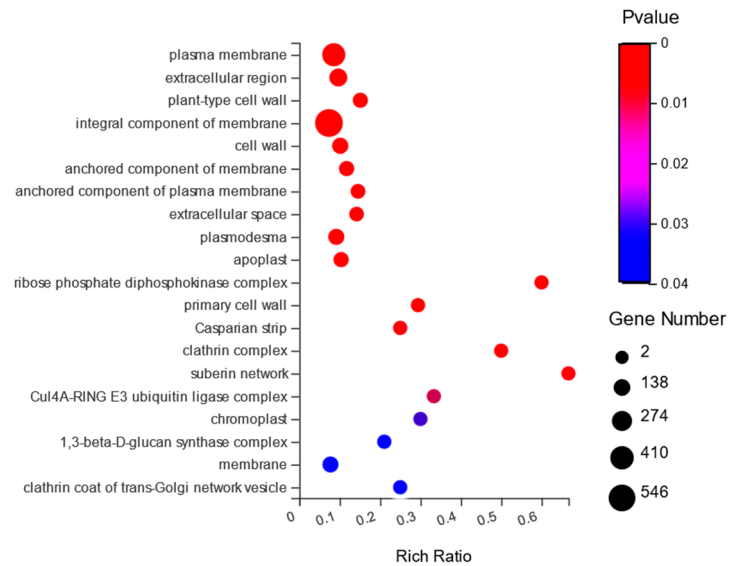

Figure S2. The result of GO cellular component analysis between *OsCIPK9-cas* and Nipponbare under 0mM NaCl treatment.

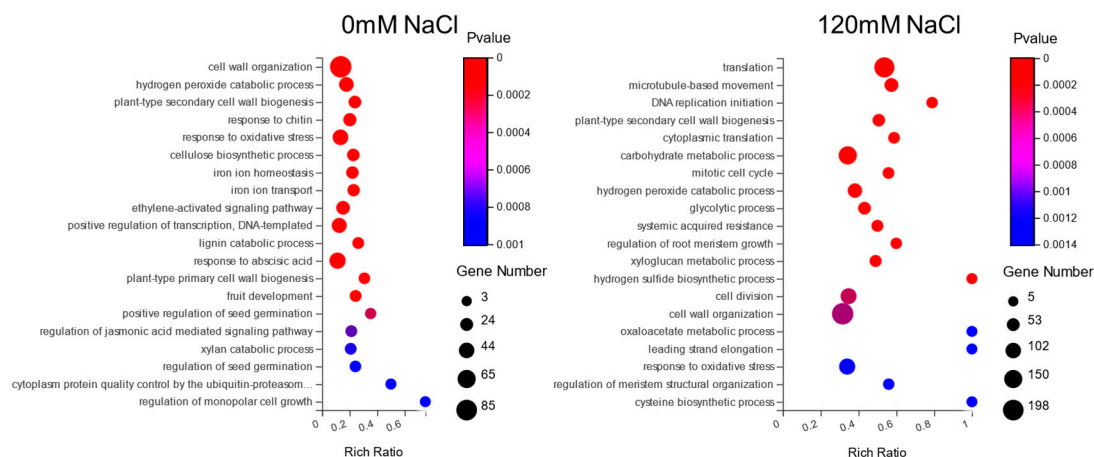

Figure S3. The result of GO biological process analysis between *OsCIPK9-cas* and Nipponbare under 0mM and 120mM NaCl treatment.

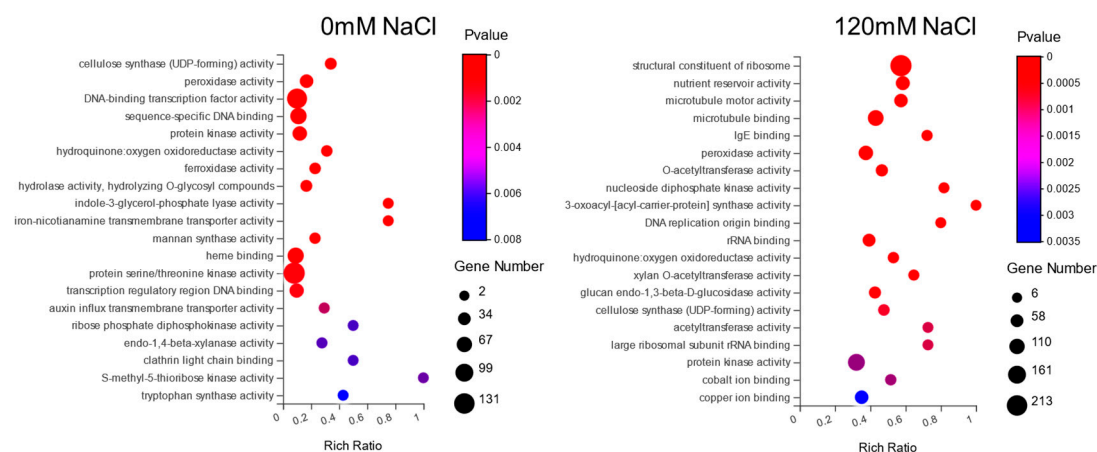

Figure S4. The result of GO molecular function analysis between *OsCIPK9-cas* and Nipponbare under 0mM and 120mM NaCl treatment.

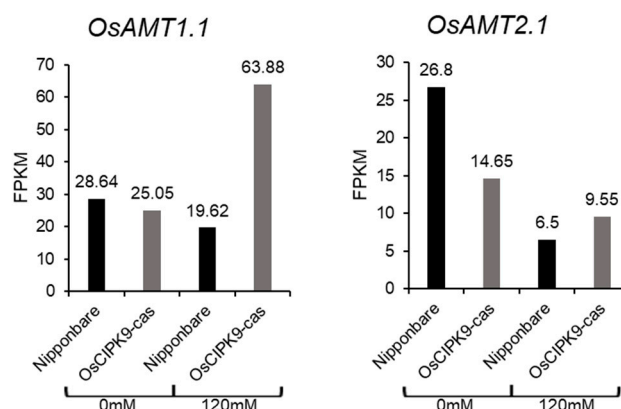

Figure S5. The FPKM of *OsAMT1.1* and *OsAMT2.1* in Nipponbare and knock-out line (*OsCIPK9-cas*) under 0mM and 120mM NaCl conditions.
